# Supplementary material for: HIV-1 Reverse Transcriptase Expression in HPV16-Infected Epidermoid Carcinoma Cells Alters E6 Expression and Cellular Metabolism, and Induces a Hybrid Epithelial/Mesenchymal Cell Phenotype
Source: MDPI journal article supplement (doi:10.3390/v16020193), 2024-01-26
Supplement: s1 [file s1]

## SUPPLEMENTARY MATERIALS

**Supplementary Table S1.** List of primers used in the experiments. Fw – forward, rev – reverse.

| Target sequence<br>(gene)                                 | Direction | Primer sequence                    |
|-----------------------------------------------------------|-----------|------------------------------------|
| <i>GAPDH</i>                                              | fw        | 5'-CAACGGATTTGGTCGTATTGG-3'        |
|                                                           | rev       | 5'-GCAACAATATCCACTTTACCAGAGTTAA-3' |
| <i>GUSB</i>                                               | fw        | 5'-CGTGGTTGGAGAGCTCATTTGGAA-3'     |
|                                                           | rev       | 5'-ATTCCCCAGCACTCTCGTCGGT-3'       |
| <i>Reverse transcriptase of HIV-1 FSU_A strain (RT_A)</i> | fw        | 5'-CTGGAGCTTGCTGAGAATAGAG-3'       |
|                                                           | rev       | 5'-CACTGGTCCTGTCCTTGTTT-3'         |
| <i>E6FL</i>                                               | fw        | 5'-AAGTTAACCACAGTTATGC-3'          |
|                                                           | rev       | 5'-TGTTCTAATGTTGTTCCAT-3'          |
| <i>E6*I</i>                                               | fw        | 5'-AGGAGCGACCCAGAAAGTTA-3'         |
|                                                           | rev       | 5'-GCTTTTGACAGTTAATACACCTCAC-3'    |
| <i>E6*II</i>                                              | fw        | 5'-AGGAGCGACCCAGAAAGTTA-3'         |
|                                                           | rev       | 5'-TACGTGTTCTTATGATCTCAGGTC-3'     |
| <i>E7</i>                                                 | fw        | 5'-CGGACAGAGCCCATTACAATA-3'        |
|                                                           | rev       | 5'-GAATGTCTACGTGTGTGCTTTG-3'       |
| <i>NRF2</i>                                               | fw        | 5'-TACTCCCAGGTTGCCACA-3'           |
|                                                           | rev       | 5'-CATCTACAAACGGGAATGTCTGC-3'      |
| <i>GCLC</i>                                               | fw        | 5'-GGATTTGGAAATGGGCAATTG-3'        |
|                                                           | rev       | 5'-CTCAGATATACTGCAGGCTTGGAA-3'     |
| <i>NQO1</i>                                               | fw        | 5'-CCGTGGATCCCTTGCAGAGA-3'         |
|                                                           | rev       | 5'-AGGACCCTTCCGGAGTAAGA-3'         |
| <i>A-TUBULIN</i>                                          | fw        | 5'-CCACAGTCATTGATGAAGTTCG-3'       |
|                                                           | rev       | 5'-GCTGTGGAAAACCAAGAAGC-3'         |
| <i>Y-TUBULIN</i>                                          | fw        | 5'-CCCTCATCTGCCTTACTGGTTG-3'       |
|                                                           | rev       | 5'-AGGTCCCTGATCTGTGCTCTGA-3'       |
| <i>E-CADHERIN</i>                                         | fw        | 5'-GAGTGCCAACTGGACCATTTC-3'        |
|                                                           | rev       | 5'-ACCCACCTCTAAGCCATCT-3'          |
| <i>N-CADHERIN</i>                                         | fw        | 5'-TGGAACGCAGTGTACAGAATCAG-3'      |
|                                                           | rev       | 5'-TTGACTGAGGCGGGTGCTGAATT-3'      |
| <i>VIMENTIN</i>                                           | fw        | 5'-AGATGGCCCTTGACATTGAG-3'         |
|                                                           | rev       | 5'-CCAGAGGGAGTGAATCCAGA-3'         |
| <i>TWIST1</i>                                             | fw        | 5'-GCAAGAAGTCGAGCGAAGAT-3'         |
|                                                           | rev       | 5'-GCTCTGCAGCTCCTCGAA-3'           |
| <i>SNAI1</i>                                              | fw        | 5'-CGAAAGGCCTTCAACTGCAAAT-3'       |
|                                                           | rev       | 5'-ACTGGTACTTCTTGACATCTG-3'        |
| <i>SNAI2</i>                                              | fw        | 5'-CTGGGCTGGCCAAACATAAG-3'         |
|                                                           | rev       | 5'-CCTTGTCACAGTATTTACAGCTGAAAG-3'  |

|                                                                                 |       |                                                           |
|---------------------------------------------------------------------------------|-------|-----------------------------------------------------------|
| <i>Primers and probe specific to the 5'-end of the provirus genome:<br/>GAG</i> | fw    | 5'-GGAGCTAGAACGATTGCAGTTA-3'                              |
|                                                                                 | rev   | 5'-GGTTGTAGCTGTCCCAGTATTTGTC-3'                           |
|                                                                                 | probe | 5'-(FAM)-<br>ACAGCCTTCTGATGTTTCTAACAGGCCAGG-<br>(BHQ1)-3' |
| <i>HB2</i>                                                                      | fw    | 5'-TCCGTGTGGATCGGCGGCTCCA-3'                              |
|                                                                                 | rev   | 5'-CTGCTTGCTGATCCACATCTG-3'                               |
|                                                                                 | probe | 5'-(HEX)-CCTGGCCTCGCTGTCCACCTTCCA-<br>(BHQ2)- 3'          |
| <i>Lentiviral insertion (PGK-seq/dir)</i>                                       | fw    | 5'-GGTGTTCGCGATTCTGCAAG-3'                                |
| <i>Lentiviral insertion (pLVTseq200R)</i>                                       | rev   | 5'-GACAACGGGCCACAACCTCC-3'                                |

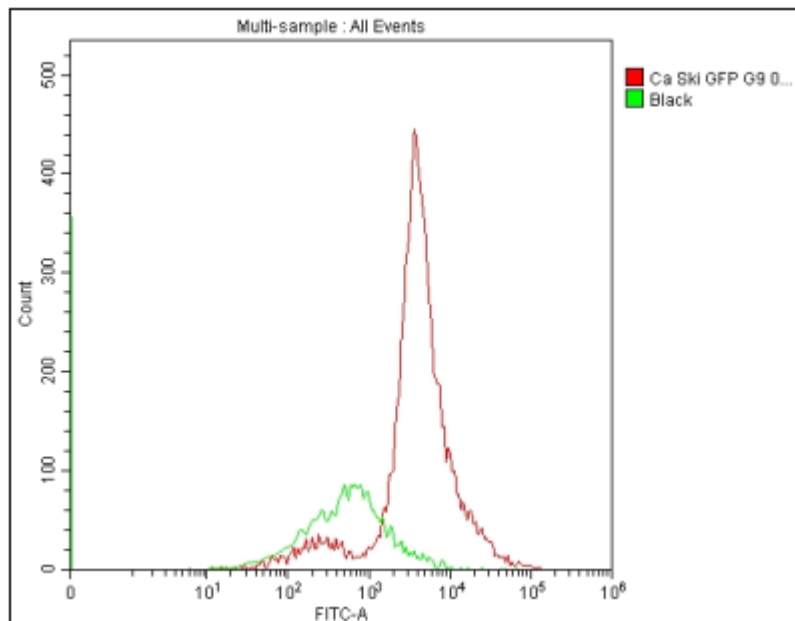

**Supplementary Figure S1.** Confirmation of GFP expression in Ca Ski subclone by flow cytometry. Histogram of events count recorded in FITC-A channel. Ca Ski GFP subclone (red) and control Ca Ski cell line (green). Events were counted among all events without gating.

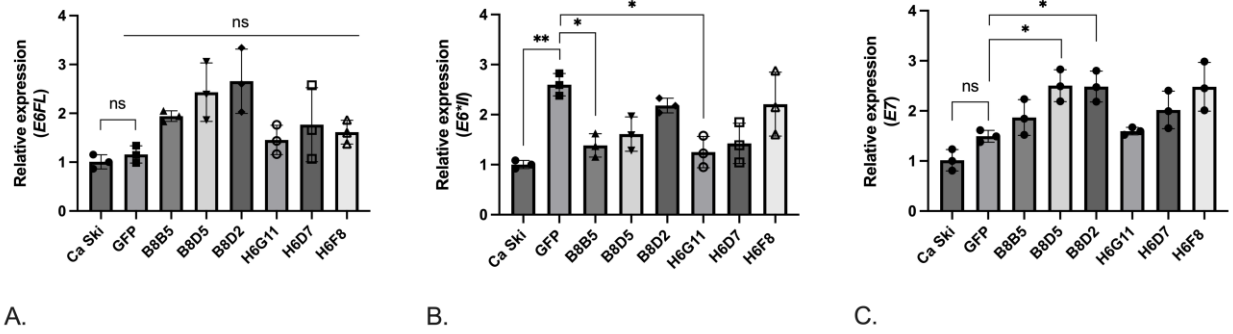

**Supplementary Figure S2.** Relative mRNA expression levels of *E6FL* (A), *E6\*II* isoforms (B) and *E7* (C) HPV16 in Ca Ski subclones expressing consensus HIV-1 FSU\_A reverse transcriptase compared Ca Ski expressing GFP and parental Ca Ski cells. Expression level was normalized to *GAPDH* expression and calculated as fold change compared to the parental Ca Ski line. Results are presented as mean  $\pm$  SD, ns: not significant; \* $p < 0.05$ ; \*\* $p < 0.01$ ; \*\*\* $p < 0.001$ ; \*\*\*\* $p < 0.0001$  by Unpaired t test with Bonferroni correction.

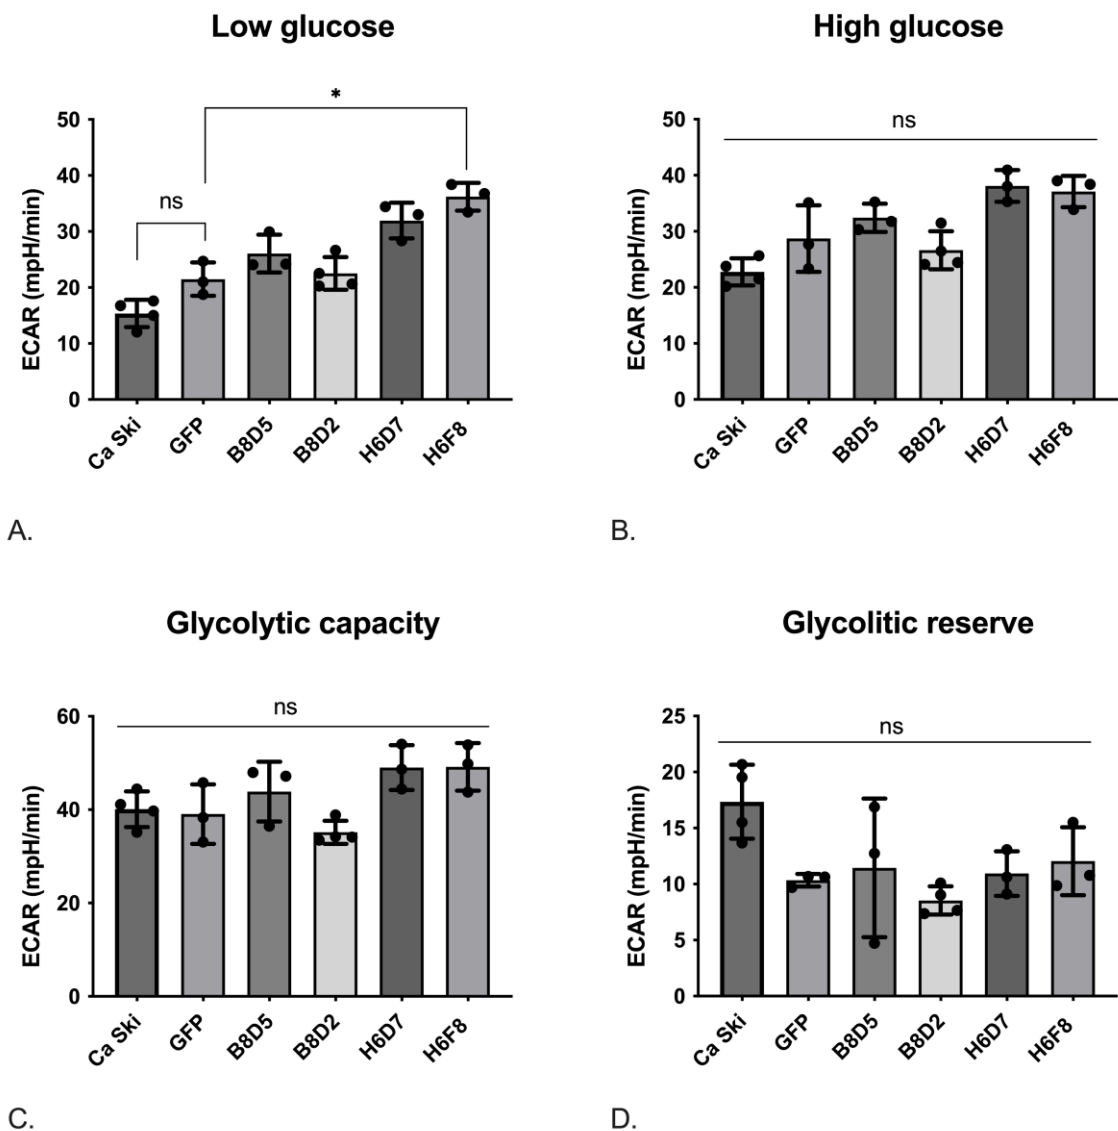

**Supplementary Figure S3.** The efficiency of glycolysis in Ca Ski subclones expressing HIV-1 reverse transcriptase (RT\_A). Glycolysis efficiency of Ca Ski derivatives was evaluated using a Seahorse analyzer according to the Glycostress test method. Determination of ECAR in medium with standard low, 11 mM (A), and high, 30 mM glucose concentration (B); Maximum ECAR values upon stimulation with 1  $\mu$ M oligomycin (C); The difference between the maximum glycolytic capacity and the level of glycolysis at 30 mM glucose (D). ECAR values are expressed in units of mpH/min and normalized to 1 mg of total cellular protein (mpH/min/Norm. Unit). Histograms are presented as mean  $\pm$  SD for the analysis performed in quadruplicate. Significant difference was assessed using Unpaired t test with Bonferroni correction. ns: not significant; \* $p < 0.05$ ; \*\* $p < 0.01$ ; \*\*\* $p < 0.001$ ; \*\*\*\* $p < 0.0001$ .

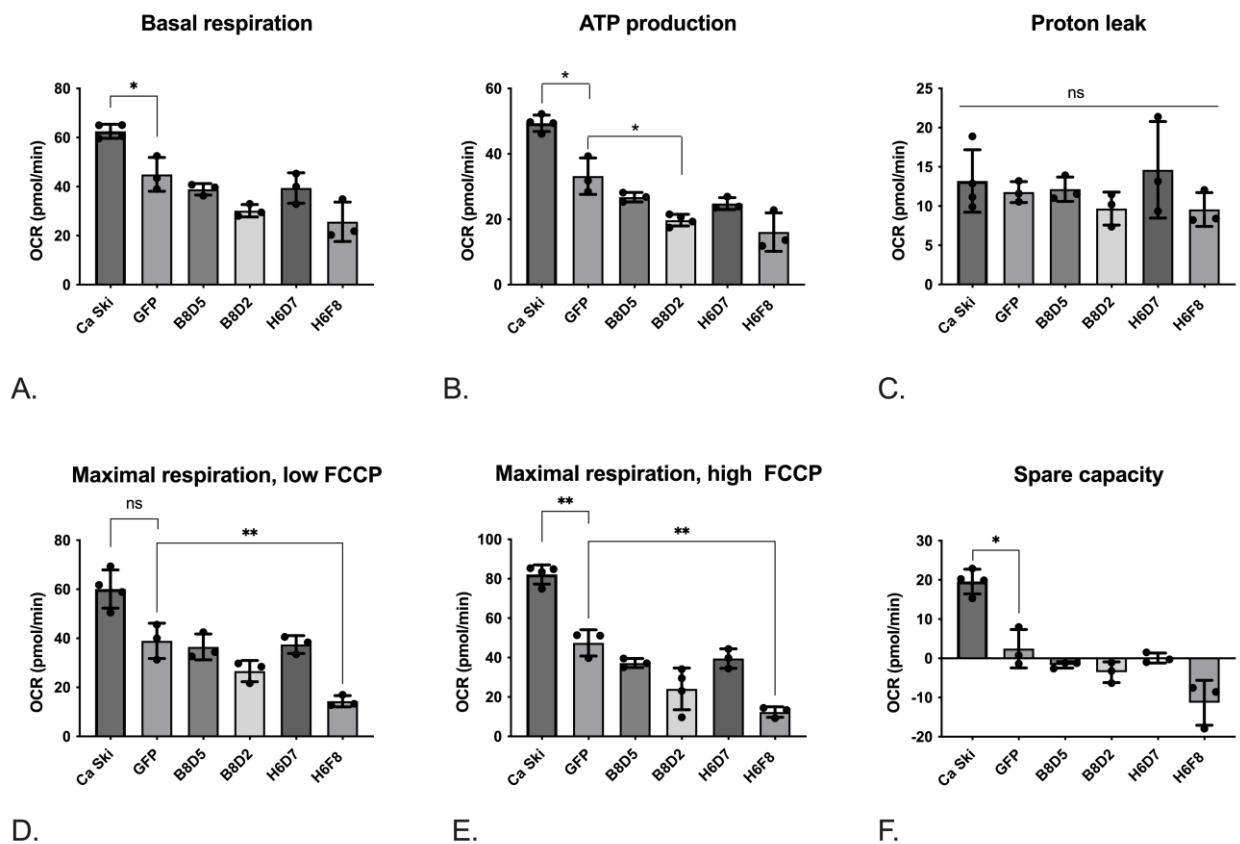

**Supplementary Figure S4.** The efficiency of the respiratory activity in Ca Ski subclones expressing HIV-1 reverse transcriptase (RT\_A). Respiratory activity of Ca Ski derivatives was analyzed using Seahorse technology and the Mitostress reagent kit. Basal respiration rate determined as the difference between baseline and non-mitochondrial OCR values (A). ATP-bound OCR determined as the difference between the basal OCR and OCR inhibited by antimycin A (B); Maximum OCR value stimulated by the addition of FCCP at concentrations of 0.75 (C) and 1.5  $\mu$ M (D); The difference between the levels of basal and maximum respiration (E). OCR values are expressed in units of pmol/min and normalized to 1 mg of total cellular protein (pmol/min/Norm. Unit). Histograms are presented as mean  $\pm$  SD for the analysis performed in quadruplicate. Significant difference was assessed using Unpaired t test with Bonferroni correction. ns: not significant; \* $p < 0.05$ ; \*\* $p < 0.01$ ; \*\*\* $p < 0.001$ ; \*\*\*\* $p < 0.0001$ .

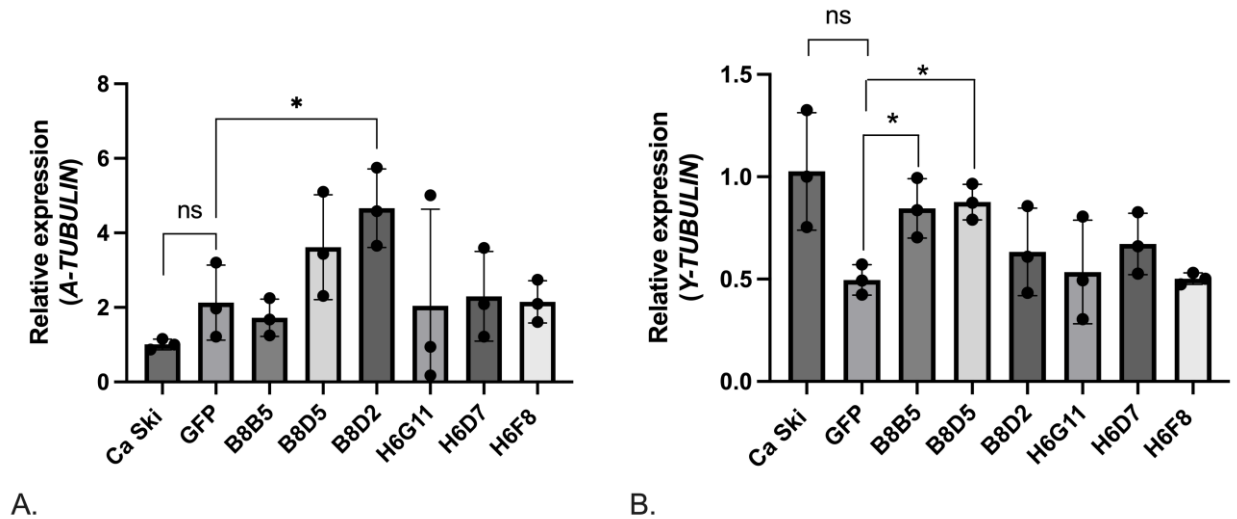

**Supplementary Figure S5.** Relative mRNA expression levels of *A-TUBULIN* (A) and *Y-TUBULIN* (B) in the derivatives of Ca Ski cells expressing variants of consensus HIV-1 FSU\_A reverse transcriptase. Expression level was normalized to *GUSB* expression and calculated as fold change compared to the parental Ca Ski line. Results are presented as mean  $\pm$  SD, ns: not significant; \* $p < 0.05$ ; \*\* $p < 0.01$ ; \*\*\* $p < 0.001$ ; \*\*\*\* $p < 0.0001$  by Unpaired t test with Bonferroni correction.

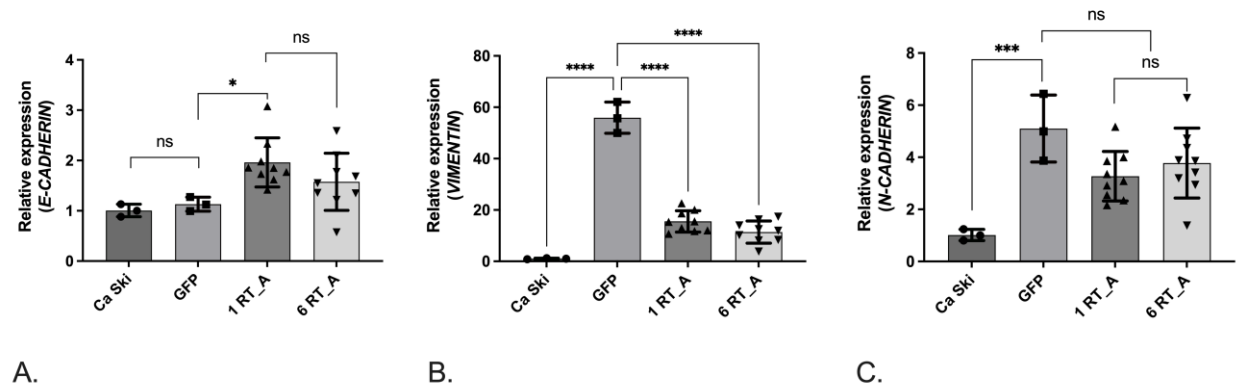

**Supplementary Figure S6.** Relative mRNA expression levels of *E-CADHERIN* (a), *VIMENTIN* (b), *N-CADHERIN* (c) in the derivatives of Ca Ski cells expressing HIV-1 RT\_A. Ca Ski subclones with one genomic insert of RT\_A coding sequence (B8B5, B8D5, B8D2) are designated as “1 RT\_A”, and with six inserts as “6 RT\_A” (H6G11, H6D7, H6F8), Ca Ski with six genomic inserts of GFP is given as a control. Expression level was normalized to *GAPDH* expression and calculated as fold change compared to the parental Ca Ski cell line. Results are presented as mean  $\pm$  SD, ns: not significant; \* $p < 0.05$ ; \*\* $p < 0.01$ ; \*\*\* $p < 0.001$ ; \*\*\*\* $p < 0.0001$  by Unpaired t test with Bonferroni correction.

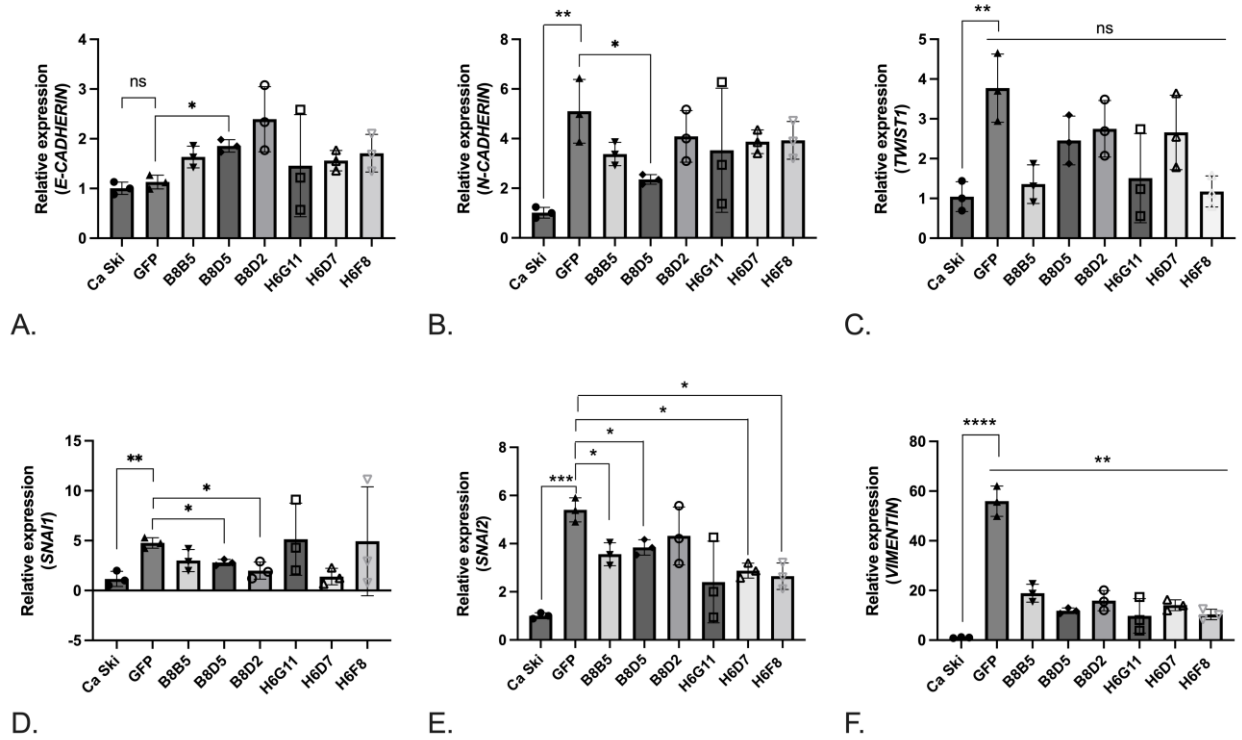

**Supplementary Figure S7.** Relative mRNA expression levels of *E-CADHERIN* (A), *N-CADHERIN* (B), *TWIST1* (C), *SNAI1* (D), *SNAI2* (E), *VIMENTIN* (F) in the derivatives of Ca Ski cells expressing variants of consensus HIV-1 FSU\_A reverse transcriptase. Expression level was normalized to *GAPDH* expression and calculated as fold change compared to the parental Ca Ski line. Results are presented as mean  $\pm$  SD. \*Significant difference from the value of the migration rate in GFP subclone (\*p < 0.05; \*\*p < 0.01; \*\*\*p < 0.001; \*\*\*\*p < 0.0001; Unpaired t test with Bonferroni correction).

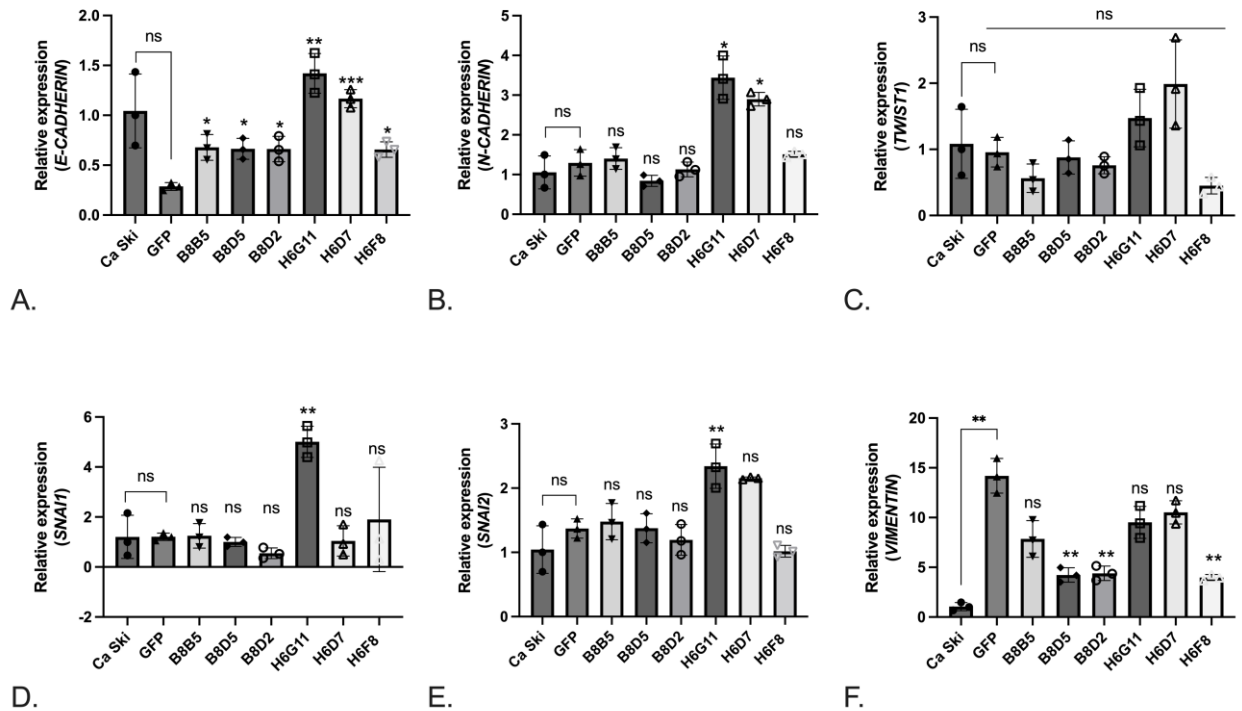

**Supplementary Figure S8.** Relative mRNA expression levels of *E-CADHERIN* (A), *N-CADHERIN* (B), *TWIST1* (C), *SNAIL* (D), *SNAI2* (E), *VIMENTIN* (F) in the derivatives of Ca Ski cells expressing variants of consensus HIV-1 FSU\_A reverse transcriptase. Expression level was normalized to *GUSB* expression and calculated as fold change compared to the parental Ca Ski line. Results are presented as mean  $\pm$  SD. \*Significant difference from the value of the migration rate in GFP subclone (\* $p < 0.05$ ; \*\* $p < 0.01$ ; \*\*\* $p < 0.001$ ; \*\*\*\* $p < 0.0001$ ; Unpaired t test with Bonferroni correction).

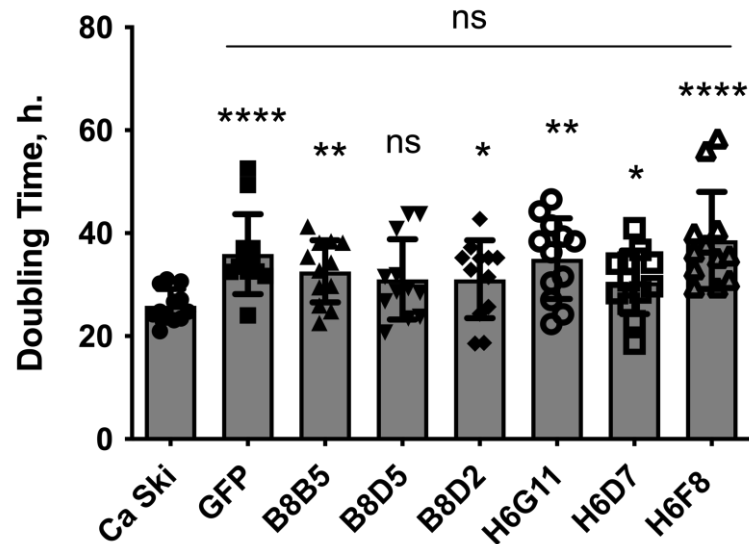

**Supplementary Figure S9.** The doubling time in the derivatives of Ca Ski cells expressing variants of consensus HIV-1 FSU\_A reverse transcriptase over month of consecutive observations. \*Significant difference from the value of doubling time in Ca Ski subclone (Kruskal - Wallis,  $n = 12$ , \* $p < 0.05$ ; \*\* $p < 0.01$ ; \*\*\* $p < 0.001$ ; \*\*\*\* $p < 0.0001$ ).

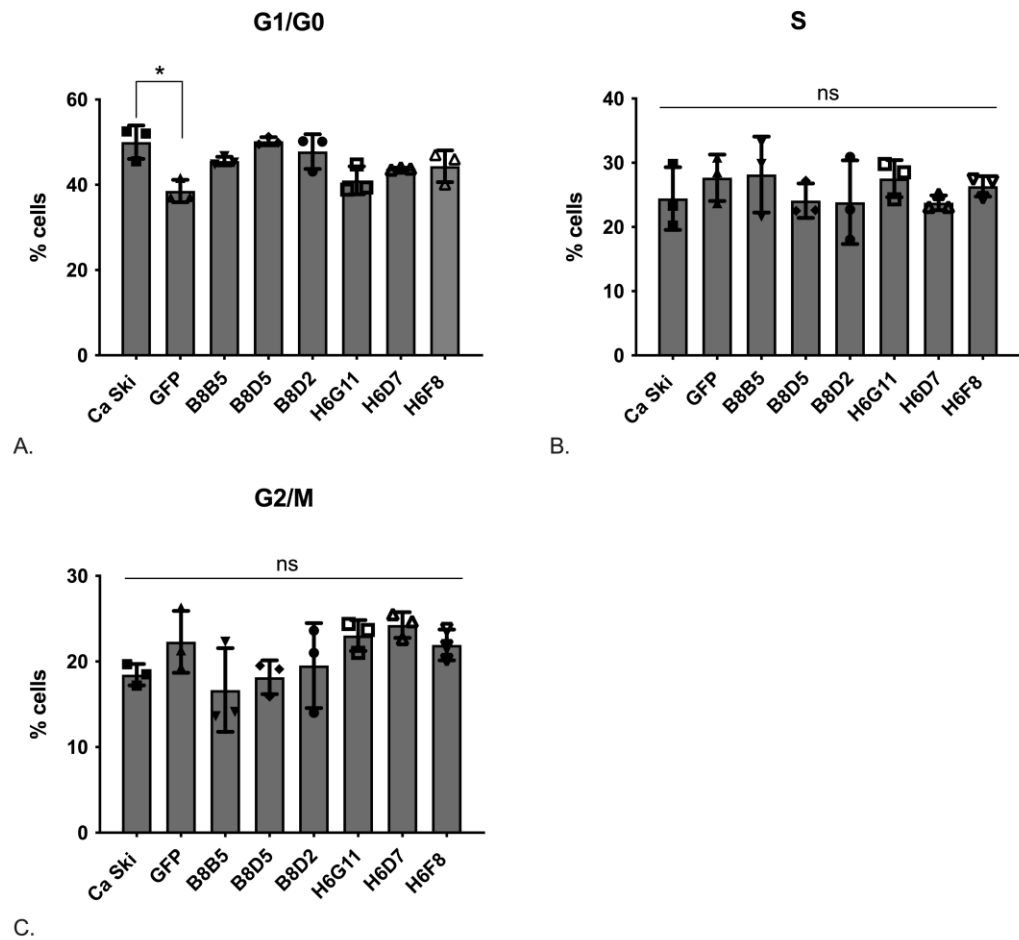

**Supplementary Figure S10.** Cell cycle distribution for subclones of Ca Ski expressing RT: G1/G0 phase (A), S phase (B), and G2/M phase (C). Distribution of cells in G1/G0, S, and G2/M areas was assessed using FlowJo software. Further analysis was performed automatically with preset G1 and G2 peaks and CVs at all samples. Data were analyzed using Kruskal-Wallis test with Dunn's multiple comparison test and in pairs using the Mann-Whitney test (\* $p < 0.05$ ).

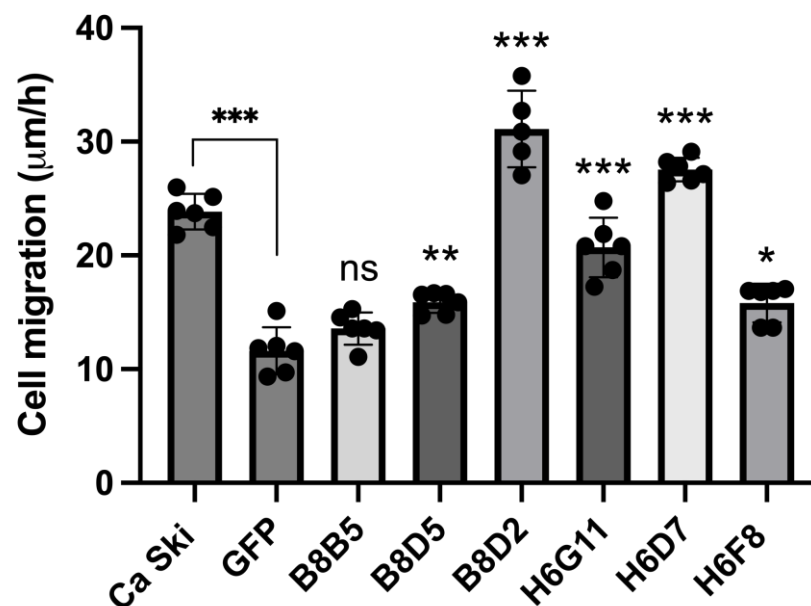



**Supplementary Figure S11.** Average migration rate of Ca Ski-derived subclones. Data are presented as mean  $\pm$  SD (6 replicates). The previously described method (<https://www.ncbi.nlm.nih.gov/pmc/articles/PMC5154238/>) was used to estimate the obtained area values. For each individual repetition, the equation  $y=mx+b$  was built (by the points of the wound area at each individual hour), which made it possible to obtain the slope parameter (m). Then,  $U \text{ migration} = |\text{slope}| / 2 \cdot L$ , where U is the speed of migration, slope is the slope (m), and L is the length of the wound. The slope of the resulting plots gives the migration rate in  $\mu\text{m/h}$ . The figure shows the migration rate for each iteration. Values are presented as mean  $\pm$  SD from the assay run in triplicates. \*Significant difference from the value of the migration rate in GFP subclone (\* $p < 0.05$ ; \*\* $p < 0.01$ ; \*\*\* $p < 0.001$ ; \*\*\*\* $p < 0.0001$ ; Unpaired t test with Bonferroni correction).

**Supplementary Table S2.** Correlation of HIV-1 RT\_A mRNA expression and protein production with phenotypic parameters: cell doubling time, distribution of cells by the phases of the cell cycle, and migration rate of Ca Ski and Ca Ski subclones (Spearman's rank correlation test).

|                 | Doubling Time, h | WHA, migration rate, $\mu\text{m/h}$ | G1/G0, %  | G2/M, %  | S, %      |
|-----------------|------------------|--------------------------------------|-----------|----------|-----------|
| RT_A mRNA, 2DCt | 0,453463         | 0,292359                             | -0,161705 | 0,393087 | 0,047599  |
| RT_A, fg/cell   | 0,300995         | 0,108265                             | -0,113500 | 0,324286 | -0,027858 |

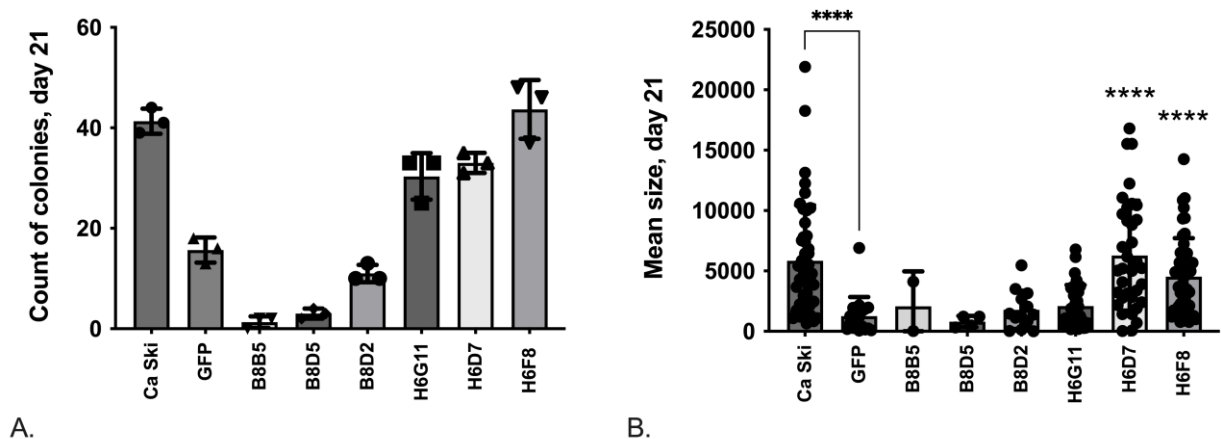

**Supplementary Figure S12.** Evaluation of clonogenic growth at days 21. Colony counts (A); The mean colony size (B). Statistical significance was assessed using the Kruskal-Wallis test with Dunn's multiple comparison test and in pairs using the Mann-Whitney test (\* $p < 0.05$ ; \*\* $p < 0.01$ ; \*\*\* $p < 0.001$ ; \*\*\*\* $p < 0.0001$ ).
